# 1 **The making of the oral microbiome in Agta hunter-gatherers**

2 Begoña Dobon<sup>1,2+</sup>, Federico Musciotto<sup>1,3+</sup>, Alex Mira<sup>4,5</sup>, Michael Greenacre<sup>6,7</sup>, Abigail  
3 E. Page<sup>8</sup>, Mark Dyble<sup>9</sup>, Daniel Smith<sup>10</sup>, Sylvain Viguier<sup>9</sup>, Rodolph Schläpfer<sup>1</sup>,  
4 Gabriela Aguilera<sup>2</sup>, Leonora H. Astete<sup>11</sup>, Marilyn Ngales<sup>11</sup>, Vito Latora<sup>12,13,14</sup>, Federico  
5 Battiston<sup>1,15</sup>, Lucio Vinicius<sup>1,9#</sup>, Andrea B. Migliano<sup>1,9#\*</sup>, Jaume Bertranpetit<sup>2#\*</sup>

6

7 <sup>1</sup>Department of Anthropology, University of Zurich; Zurich, Switzerland.

8 <sup>2</sup>Institut de Biologia Evolutiva (CSIC-Universitat Pompeu Fabra); Barcelona, Spain

9 <sup>3</sup>Dipartimento di Fisica e Chimica, Università di Palermo; Palermo, Italy.

10 <sup>4</sup>Department of Health and Genomics, Center for Advanced Research in Public Health,  
11 FISABIO Foundation; Valencia, Spain.

12 <sup>5</sup>CIBER Center for Epidemiology and Public Health; Madrid, Spain

13 <sup>6</sup>Department of Economics and Business, Universitat Pompeu Fabra & Barcelona  
14 Graduate School of Economics; Barcelona, Spain.

15 <sup>7</sup>Faculty of Biosciences, Fisheries and Economics, University of Tromsø; Norway.

16 <sup>8</sup>Department of Population Health, London School of Hygiene and Tropical Medicine;  
17 London, UK.

18 <sup>9</sup>Department of Anthropology, University College London; London, UK.

19 <sup>10</sup>Bristol Medical School, University of Bristol; Bristol, UK.

20 <sup>11</sup>Lyceum of the Philippines University, Intramuros, Manila, Philippines.

21 <sup>12</sup>School of Mathematical Sciences, Queen Mary University of London; London, UK.

22 <sup>13</sup>Dipartimento di Fisica ed Astronomia, Università di Catania and INFN; Catania, Italy.

23 <sup>14</sup>Complexity Science Hub Vienna (CSHV); Vienna, Austria.

24 <sup>15</sup>Department of Network and Data Science, Central European University; Vienna 1100,  
25 Austria.

26 <sup>+</sup>These authors contributed equally to this work.

27 <sup>#</sup>These authors contributed equally to this work.

28 <sup>\*</sup>Corresponding authors. Email: [jaume.bertranpetit@upf.edu](mailto:jaume.bertranpetit@upf.edu), [andrea.migliano@uzh.ch](mailto:andrea.migliano@uzh.ch)

29

30 **Abstract**

31 **Ecological and genetic factors have influenced the composition of the human**  
32 **microbiome during our evolutionary history. We analyzed the oral microbiota of**  
33 **the Agta, a hunter-gatherer population where part of its members is adopting an**  
34 **agricultural diet. We show that age is the strongest factor modulating the**  
35 **microbiome, likely through immunosenescence as there is an increase of**  
36 **pathogenicity with age. Biological and cultural processes generate sexual**  
37 **dimorphism in the oral microbiome. A small subset of oral bacteria is influenced**  
38 **by the host genome, linking host collagen genes to bacterial biofilm formation. Our**  
39 **data also suggests that shifting from a fish/meat to a rice-rich diet transforms their**  
40 **microbiome, mirroring the Neolithic transition. All these factors have implications**  
41 **in the epidemiology of oral diseases. Thus, the human oral microbiome is**  
42 **multifactorial, and shaped by various ecological and social factors that modify the**  
43 **oral environment.**

44

45 **Introduction**

46 The composition and diversity of the human oral microbiota has been influenced by  
47 several factors during our evolutionary history<sup>1,2</sup>. Some are intrinsic biological  
48 characteristics of the host, such as age, sex, and genetic composition, while others such  
49 as diet, drinking water sources, oral hygiene, lifestyle and social interactions are  
50 external factors<sup>2-4</sup>. These factors modulate the physiological conditions of the oral  
51 cavity and affect the composition and diversity of the oral microbiota. While the oral  
52 microbiota is one of the most diverse sites in the human body and shows high variability  
53 between individuals, it remains stable within individuals over time<sup>5</sup>. Little is known

54 about how the composition of the oral microbiome is modulated in populations adapted  
55 to the hunting and gathering niche, where the fully mature oral biofilm microbiome can  
56 be studied without the confounding effects of tooth brushing or professional dental  
57 cleaning, similar conditions to how the human oral microbiome must have evolved in  
58 the past<sup>6</sup>.

59 To investigate the multiple ecological and genetic factors shaping the human oral  
60 microbiome, we have analysed the oral microbiome of the Agta hunter-gatherers from  
61 the Philippines. The Agta are predominantly hunter-gatherers (fishing, hunting, and  
62 gathering)<sup>7</sup>, and while their main source of animal protein is obtained by riverine and  
63 marine spearfishing or by hunting, other activities such as inter-tidal foraging, wild food  
64 gathering, low-intensity cultivation, wage labour and trade complement their  
65 economy<sup>8,9</sup>. Interestingly, there is high variability among the Agta on the amount of  
66 hunting, gathering and sea foraging products that is traded for rice and other items (such  
67 as tobacco) with farming neighbours<sup>7</sup>, causing the Agta lifestyle to range from  
68 completely mobile foragers with a protein-rich diet, to settled low intensity farmers,  
69 with a rice-rich diet<sup>7,9,10</sup>.

70 To detect fine-scale variation in the oral microbiome of Agta hunter-gatherers, we  
71 collected saliva samples from 138 Agta, aged 5 to 65 years, sequencing the 16S rRNA  
72 region, and identified 5430 amplicon sequence variants (ASVs)<sup>11</sup> belonging to 110  
73 genera. To study the genetic host factors associated with the microbiome composition  
74 we also genotyped all individuals with the Axiom Genome-wide Human Origins array.  
75 We combined this information with additional individual data on household  
76 composition, age, sex, and diet, measured as the proportion of meals including meat/fish  
77 (any animal protein), and proportion of meals that consisted of only agricultural  
78 products (rice) (Supplementary Figure 1). By using this rich dataset, we have been able

79 to discern the different contributions of age, sex, diet, and host genetics in the making of  
80 the oral environment.

81

## 82 **Results**

83 **Factors influencing Agta oral microbiome composition.** The Agta oral microbiome is  
84 mostly composed by *Firmicutes* (mean ASV prevalence = 33.1%, sd = 11.4),  
85 *Proteobacteria* (27±14.6%), *Actinobacteria* (15.5±8.3%) and *Bacteroidetes*  
86 (14.5±7.7%) (Supplementary Figure 2). To compare and identify the main ecological  
87 and social factors contributing to microbiome variation, we performed a constrained  
88 logratio analysis (LRA)<sup>12</sup> on the bacterial genus abundance. Marginally, age explains  
89 7.2% of the total logratio variance ( $P < 0.0001$ , based on 9999 permutations), sex  
90 explains 2.2% ( $P = 0.018$ ), and diet 3.6% ( $P = 0.015$ ). Altogether they explain 13.0% of  
91 the total logratio variance. We also applied a bipartite stochastic block model (biSBM)  
92 approach<sup>13</sup> at the ASV level, where we assigned each bacterium to an individual, and  
93 then clustered the individuals according to the bacteria they have in common. We  
94 restricted the analysis to the Core Measurable Microbiota (CMM), that we define as  
95 ASVs present in at least 10% of the Agta to reduce random errors due to low-prevalent  
96 taxa (Supplementary Figure 3). The best model produced two clusters of people and  
97 three clusters of bacteria (Figure 1a). While we did not find differences in diet or  
98 proportions of sexes between the clusters of individuals (Supplementary Figure 4), they  
99 strongly differ in their age distribution: adults (mean age = 38 years old) and youth  
100 (mean age = 18 years old) (Welch t-test,  $t = 5.78$ ,  $df = 71.35$ ,  $P < 0.0001$ ), with 55.48%  
101 of ASVs in the CMM being more associated with one of the clusters of individuals.  
102 Thus, while age, diet, and sex influence the composition of Agta microbiome, the

103 biSBM singles out age as the main modulator of the hunter-gatherer core oral

104 microbiome.

105

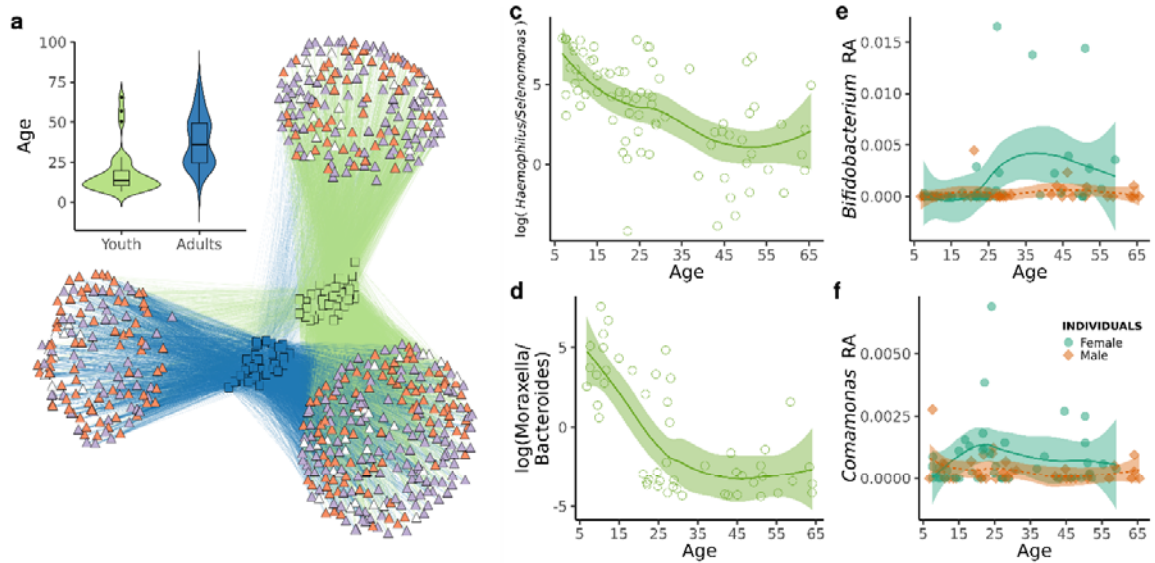

**b**

### Constrained Analysis of Age & Sex

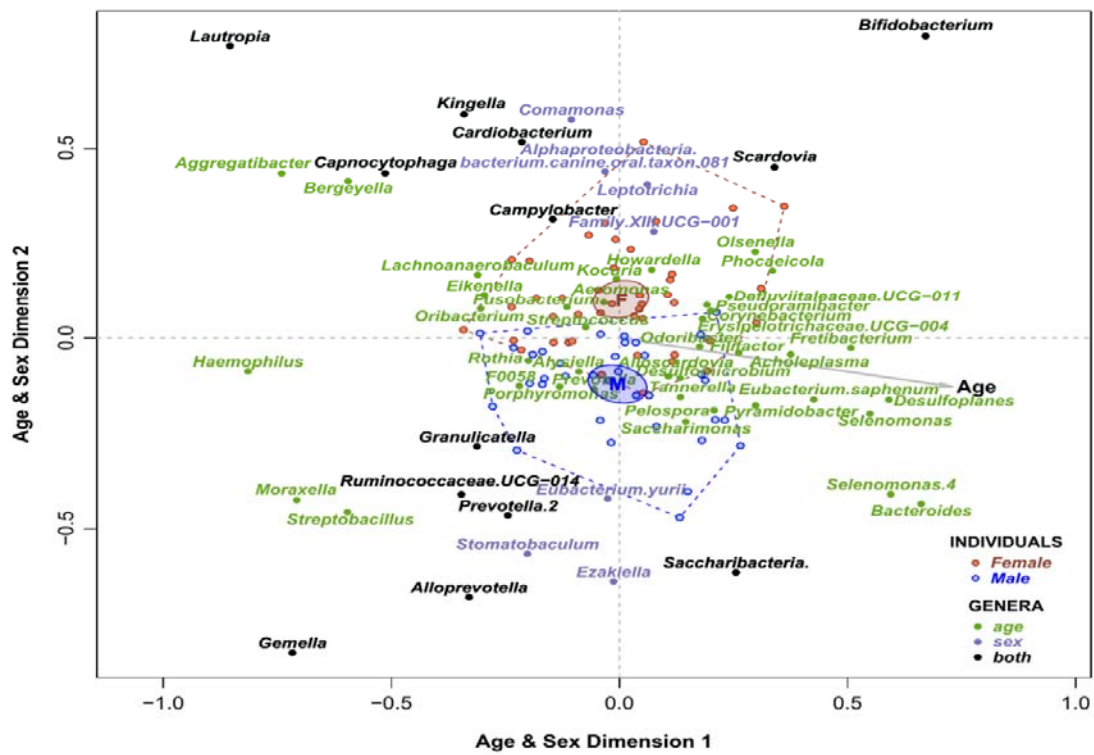

106

107

108 **Figure 1. Age and sex-related effects in the hunter-gatherer oral microbiome.** a)  
109 Network representation of the hunter-gatherer CMM. ASVs (triangles) are colour-coded  
110 as: putatively pathogenic (purple), non-pathogenic (orange) or unclassified (white).  
111 Inset shows age distribution for the two clusters of individuals (squares). b) Logratio  
112 analysis constrained to age and sex differences on the bacterial composition at genus  
113 level. The effects of diet were partialled out. Only genera statistically significant in at  
114 least 20 (for age) or 10 (for sex) logratios are displayed (p-value < 0.05 after Benjamini-  
115 Hochberg correction). Dashed lines enclose all individuals (dots) within a category of  
116 sex, with 95% confidence ellipses for their means. Taxa are colour-coded depending on  
117 the associated variable: age, sex, or both. The starting point of the grey arrow indicates  
118 the mean age of the population (30 years old). Log ratio of c) *Haemophilus* and  
119 *Selenomonas* abundance and d) *Moraxella* and *Bacteroides* according to age. Line and  
120 shaded area indicate the 95% confidence interval of the mean. Relative abundance of e)  
121 *Bifidobacterium* and f) *Comamonas* according to age and sex. Lines and shaded areas  
122 indicate the 95% confidence interval of the mean for each sex.

123

124 **Old age is associated with increased frequency of oral pathogens.** To investigate the  
125 independent effects of ageing on the oral microbiome, we performed a LRA constrained  
126 with age and sex after partialing out the effects of diet. The resulting ordination shows  
127 that the effects of age and sex are mostly independent, with only few genera being  
128 affected by both variables (Supplementary Figure 5): as expected, the first dimension is  
129 associated with the age of the individuals, while the second dimension separates them  
130 according to sex (Figure 1b).

131 There is a clear change in the composition and frequency of certain bacteria with  
132 age (Figure 1c-d). At young age, we observe organisms that typically live in mucosa,  
133 such as *Haemophilus* and *Moraxella*, that infect the upper and lower respiratory tract  
134 but are detected in the oral cavity and saliva which are their vehicles of transmission.  
135 Other genera found at younger ages include bacteria normally associated to good oral  
136 health, such as *Bergeyella* and *Rothia*<sup>14</sup>. However, at older ages we observe a marked  
137 decline in the abundance of those genera and an increase of important pathogens related  
138 with periodontitis including the “red complex” periodontal pathogen *Tannerella*, as well

139 as other periodontitis-related bacteria (*Filifactor*, *Fretibacterium*, *Saccharimonas*,  
140 *Selenomonas*, and *Phocaeicola*), consistent with a higher incidence of this disease with  
141 older age<sup>15</sup>. We also found organisms associated with cavities (*Olsenella*), with dental  
142 plaque and dental calculus formation (*Corynebacterium*), with pulmonary infections,  
143 sepsis, or bacteremia, and with chronic diseases (*Acholeplasma*) (see Methods for in-  
144 depth bacteria pathogenic classification). Another sign of ageing was the presence in the  
145 oral cavity of gut bacteria (*Bacteroides*) indicating a potential age-related decline in  
146 immunological function and filtering<sup>16</sup>. However, such changes are not associated with  
147 a decrease in the alpha-diversity of the total oral microbiome as measured by the  
148 number of bacteria observed or their phylogenetic complexity (Supplementary Figure  
149 6a-b), suggesting that the overall effect of aging is a replacement of protective and  
150 commensal bacteria by pathogenic ones. This is supported by an increase in the number  
151 of potential pathogenic bacteria in the CCM in bacterial clusters associated with older  
152 ages (Fisher exact test,  $P < 0.001$ ) (Figure 1a).

153

#### 154 **Sex differences shape composition but not diversity of the Agta oral microbiome.**

155 We found no differences in alpha-diversity in the Agta oral microbiome between males  
156 and females (Supplementary Figure 6c-d), which may be explained by sex equality  
157 within the Agta hunter-gatherer society regarding diet and social interactions<sup>17,18</sup>.  
158 Nevertheless, the LRA constrained to age and sex shows sex-related differences in the  
159 composition of the oral microbiome (Figure 1b). For example, *Stomatobaculum* and  
160 *Eubacterium yurii*, present in the oral cavity of smokers<sup>19</sup>, are associated with males,  
161 consistent with Agta men chewing tobacco more frequently than women. It is also  
162 interesting to mention *Comamonas* (Figure 1f), which even if it has been reported as a  
163 possible contaminant in microbiome studies<sup>20</sup>, its presence in females could be related



164 to its capacity of degrading the female hormone progesterone<sup>21</sup>. This bacterium has  
165 been found in subgingival samples, where female hormones could be present either in  
166 saliva or in gingival crevicular fluid.

167

168 **Age and sex interactions in microbiome composition.** Some bacteria are significantly  
169 associated to both age and sex-related differences, such as *Gemella*, which is a prevalent  
170 inhabitant of the respiratory mucosa such as *Haemophilus* and *Moraxella*, supporting  
171 the idea that mucosa-associated and/or respiratory-tract organisms are more frequently  
172 acquired in young individuals, especially males. At older ages, the  
173 *Bifidobacterium/Saccharibacteria* ratio distinguishes between sexes: while  
174 *Bifidobacterium* is associated to females, the periodontal pathogen *Saccharibacteria* is  
175 associated to males. Thus, the observed trend of increase of periodontal pathogens with  
176 age is stronger in males, as expected by the global epidemiology of the disease<sup>22,23</sup>. On  
177 the other hand, we found an increase of the caries-related pathogens *Scardovia* and  
178 *Bifidobacterium* associated to reproductive age females. Caries incidence increases with  
179 age and is more prevalent in females<sup>24</sup>, a more saccharolytic or acidic salivary  
180 environment in older women, together with hormonal fluctuations and lower salivary  
181 flow<sup>25</sup> could facilitate the proliferation of saccharolytic bacteria. The strong association  
182 of *Bifidobacterium* with adult females could also be explained by its presence in  
183 breastmilk<sup>26</sup>. Also, its proliferation coincides with the start of the reproductive age and  
184 the increase of childcare<sup>10</sup> (Figure 1d).

185

186 **Influence of variation in rice consumption on the Agta oral microbiome.** While the  
187 impact of diet on gut microbiome has been clearly established<sup>27-30</sup>, its role in the oral  
188 microbiome is still unclear. Some studies have found little or no effect, whereas others



189 have found associations with specific nutrients<sup>2,25,31,32</sup>. The variation in rice  
190 consumption in the Agta allows us to assess both the relationship between the hunter-  
191 gatherer diet on the oral microbiome and the effects of the recent introduction of  
192 farming products. We performed a LRA on the bacterial genus abundance after  
193 partialing out the effects of age and gender (Figure 2). The first dimension of the  
194 ordination shows the gradient of the transition from a diet where all meals include meat  
195 to where most consist of only rice. Agta following a hunter-gatherer diet, where most  
196 meals contain meat, have large quantities of *Actinobacillus*, *Alphaproteobacteria* and  
197 *Streptobacillus* and lower abundance of *Selenomonas*, *Atopobium*, *Peptoanaerobacter*,  
198 and *Pyramidobacter*. The higher abundance of *Actinobacillus* in individuals ingesting a  
199 protein-rich diet is particularly interesting, given the extraordinary proteolytic potential  
200 of *A. actinomycetencomitans*, a well-known oral pathogen with destructive effects in the  
201 gingival tissue and in aggressive forms of periodontitis<sup>33</sup>. At the other extreme, in  
202 individuals with a rice-rich diet, there is an increase of the highly saccharolytic dental  
203 caries pathogen *Scardovia*, of *Treponema*, of gut organisms like *Butyrivibrio* and  
204 *Erysipelotrichaceae*, and of *Eggerthia*, a rare organism isolated from dental abscesses.  
205 We also ranked the ASV based on whether they are more present than expected in  
206 individuals with high or low proportion of meals with only rice or with meat/fish. We  
207 found that the scores associating each bacterial species with these two nutrients are  
208 negatively correlated (Spearman's rho = -0.47, P < 0.0001). This fits with a general  
209 separation of oral microorganisms in saccharolytic (caries-related, acidogenic and  
210 acidophilic) and proteolytic (gum-disease and halitosis related, alkalophilic and NH<sub>4</sub>  
211 generators), as suggested in a metabolome-based study<sup>25</sup>. Our results suggest that more  
212 settled Agta, which consume more rice, experience a decline in oral health, confirming a

213 general pattern of health decline due to a Neolithic-like diet and a more farming-derived  
 214 lifestyle<sup>9,34,35</sup>.

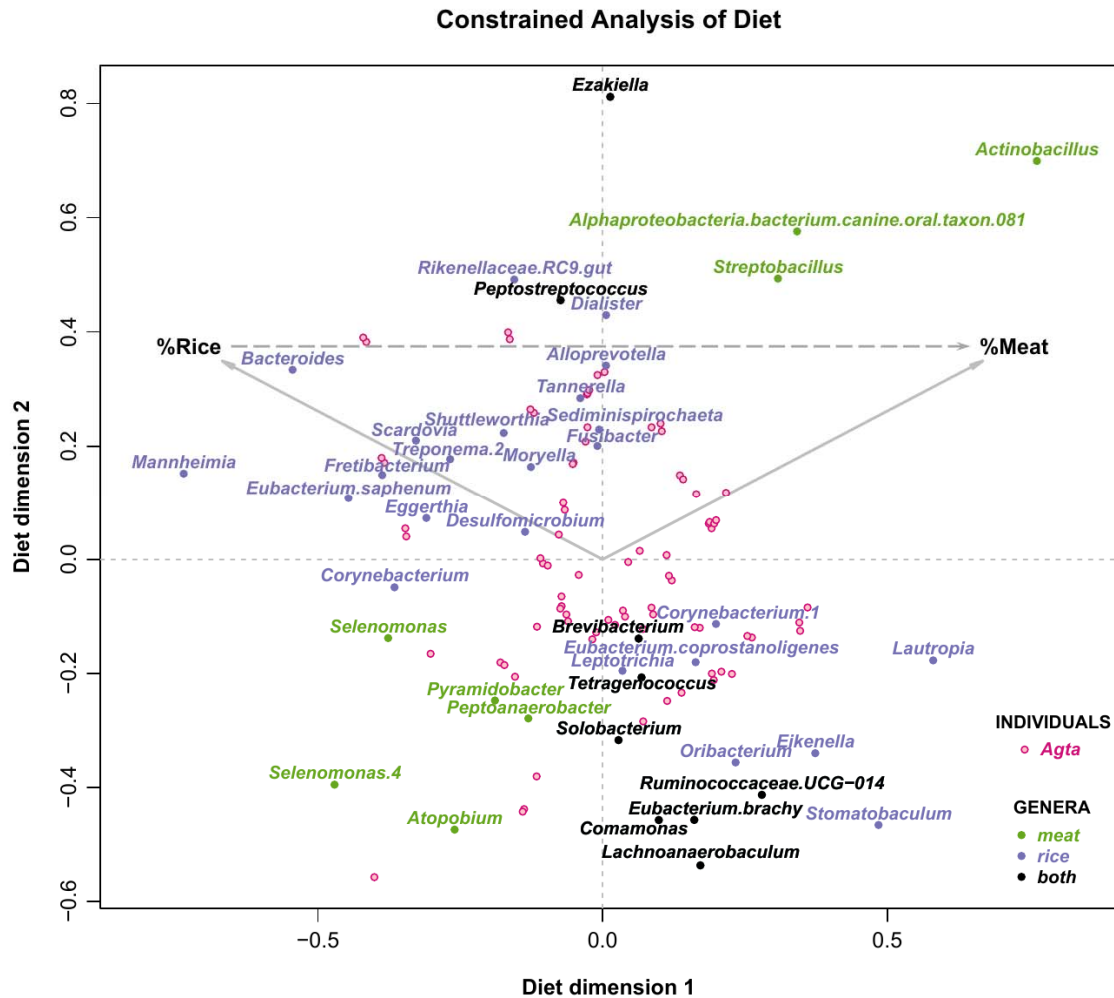

215 **Figure 2. Effect of diet on the oral microbiome in the Agta.** Logratio analysis  
 216 constrained to diet differences on the bacterial composition at genus level. The effects  
 217 of age and sex were partialled out. Only genera statistically significant in more than five  
 218 (for rice) or three (for meat) logratios are displayed (p-value < 0.05 after Benjamini-  
 219 Hochberg correction). Taxa are colour-coded based on the variable they are associated:  
 220 proportion of meals with meat (%Meat), proportion of meals with only rice (%Rice), or  
 221 both. The original result was slightly rotated so that the dashed vector indicating the  
 222 difference between %Meat and %Rice was horizontal, without any change in explained  
 223 variance.

224

225 **Pathogenic oral bacteria are associated with host collagen genes.** The interaction  
226 between the host genetic makeup and microbiome composition differs across body  
227 sites<sup>36,37</sup>, and seems especially weak in the oral cavity<sup>37,38</sup>, making it difficult to assess  
228 the co-evolution of our genome and the oral microbiome. To overcome this, we  
229 performed a genome-wide association study (GWAS) using a mixed model approach in  
230 a population that evolved in a hunter-gatherer niche and without the confounding  
231 influence of antibiotics or brushing. We treated the relative abundance of each  
232 bacterium as an independent trait, adding age, sex, and household as covariates and  
233 kinship as a random effect. Household membership was used as proxy for the strength  
234 of social interactions between individuals, as social interactions predict microbiome  
235 sharing (Musciotto *et al. companion paper*). These analyses were performed using the  
236 CMM, and then using 92 genera present in at least 10 Agta. All bacteria identified in the  
237 Agta (Supplementary Table 1 and Supplementary Figure 7) overlap with those of other  
238 oral microbiome GWAS<sup>3,36,37</sup> pointing to a small subset of oral bacteria influenced by  
239 the human genome (Figure 3). A pathway enrichment analysis linked this subset of the  
240 oral microbiome to several biological host functions (body fat metabolism, wound  
241 healing, and collagen trimmers) (Supplementary Table 2). Of relevance is an association  
242 between the pathogenic bacteria *Aggregatibacter* and *Selenomonas* with genetic  
243 variation in collagen genes. The ability to bind collagen is a vital feature in the oral  
244 cavity, as many oral bacteria require collagen-binding proteins to attach to oral tissues<sup>39</sup>  
245 suggesting a genetic basis for the predisposition of biofilm formation by those bacteria.  
246 We further tested if we could detect signatures of positive selection in the host genomic  
247 regions associated with the oral microbiome, but we found no signals indicating recent  
248 selective pressures caused by oral bacteria.

249

250

251

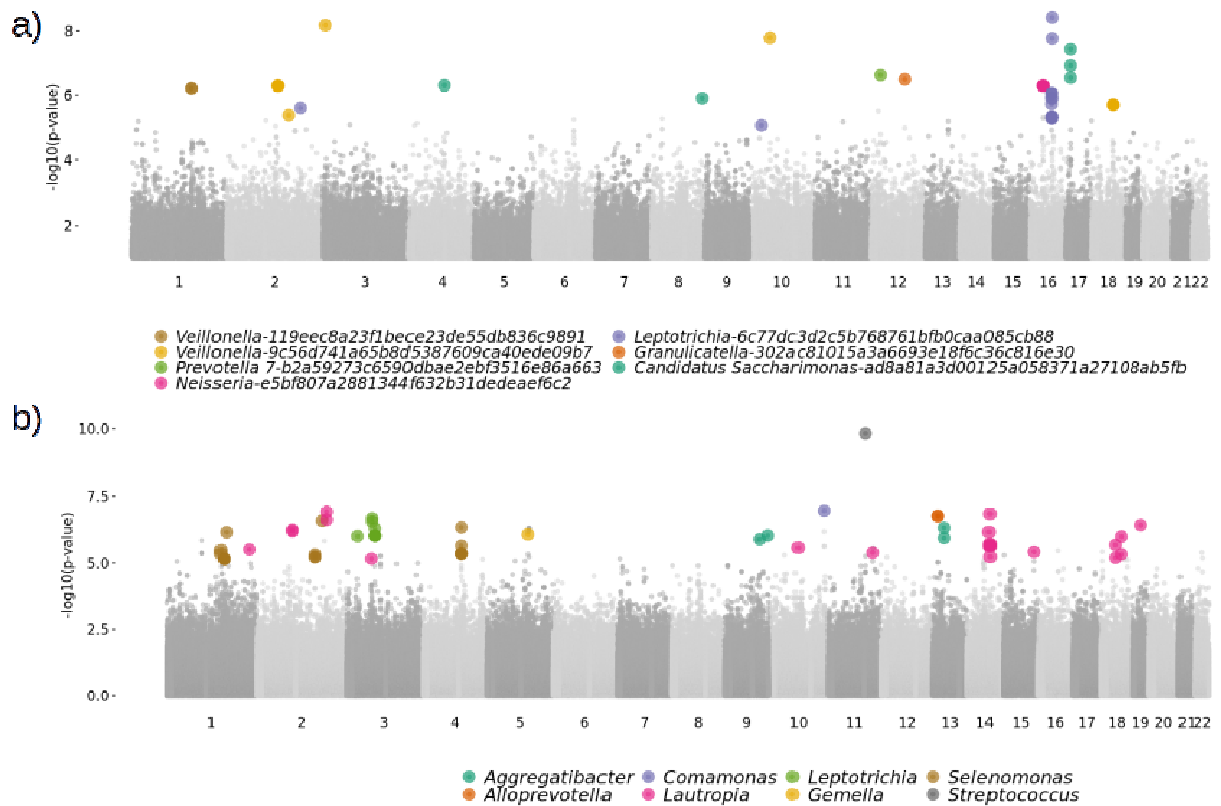

252

253 **Figure 3. Genome-wide association study on bacteria abundance.** Aggregated  
254 Manhattan plot of the GWAS results of the a) seven ASV and b) eight genera with non-  
255 zero PVE (“chip heritability”) estimates with at least one significant genetic association.  
256 Each dot is a SNP and significant SNPs-bacteria associations ( $q < 0.1$ ) are color-coded  
257 according to the associated bacteria.

258

## 259 Discussion

260 The Agta microbiome is influenced by external factors such as social interactions  
261 (Musciotto *et al. companion paper*) as well as intrinsic and ecological factors such as  
262 age, sex, diet and host genetics. Among the latter, we have shown that age has the  
263 strongest effect, with commensal or beneficial microbiota being replaced by potentially  
264 pathogenic ones with ageing. The proliferation of oral pathogenic bacteria exhibits

265 sexual dimorphism, with caries-related (in females) and periodontitis-related (in males)  
266 bacteria increasing with age, likely associated with immunosenescence<sup>40</sup> and with a sex-  
267 specific oral environment due to biological and cultural factors. In the Agta, the increase  
268 of farming-derived novel foods such as rice influences their microbiome composition  
269 and health. The relatively small subset of bacteria linked to the host genome, which are  
270 also found associated to other factors, suggests that the Agta oral microbiome is mainly  
271 affected by environmental (diet) and intrinsic factors (age), with little influence of  
272 individual host genetic variation (Supplementary Figure 5). Thus, environmental factors  
273 and not host genetics are the main driving force for oral microbiota acquisition, in  
274 agreement with Mukherjee *et. al*<sup>41</sup>. Based on the case study of the Agta hunter-  
275 gatherers, we conclude that the human oral microbiome is multifactorial with distinct  
276 subsets of bacteria shaped by specific ecological and social factors, reflecting multiple  
277 adaptations in the domains of life history, sociality, and diet.

278

279

## 280 **Methods**

### 281 **Ethics approval**

282 This study was approved by UCL Ethics Committee (UCL Ethics code 3086/003) and  
283 carried out with permission from local government and community members. Informed  
284 consent was obtained from all participants, after group and individual explanation of  
285 research objectives in the indigenous language. A small compensation (usually a  
286 thermal bottle or cooking utensils) was given to each participant. The National  
287 Commission for Indigenous Peoples (NCIP), advised us that the process of Free Prior  
288 Informed Consent with the tribal leaders, youth and elders would be necessary to  
289 validate our data collection under their supervision. It was done in 2017 with the

290 presence of all tribal leathers, elders and youth representatives at the NCIP regional  
291 office, with the mediation of the regional officer and the NCIP Attorney. The validation  
292 process was approved unanimously by the tribal leaders, and the NCIP, and validated  
293 the full 5 years of data collection.

294

### 295 **Saliva sample collection**

296 Saliva samples from 155 Palanan Agta were collected over two field seasons: April-  
297 June 2013 and February-October 2014. For comparative genetic studies we also used  
298 saliva samples from 21 Mbendjele Bayaka, an African hunter-gather population,  
299 collected in 2014, and 14 Palanan farmers collected in 2007-2009. In all cases saliva  
300 was collected using the Oragene-DNA/saliva kit and participants were asked to rinse  
301 their mouth with water and to spit into the vial until half full. After collection and  
302 transportation, saliva samples were stored at the UCL Department of Anthropology,  
303 London, UK at -20°C.

304

### 305 **Microbial DNA extraction and 16S rRNA gene sequencing**

306 A total of 155 Agta saliva samples were selected to study their microbiome  
307 composition. DNA was extracted following the protocol for manual purification of  
308 DNA for Oragene-DNA/saliva samples. The 16S rRNA gene V3-V4 region was  
309 amplified by PCR with primers containing Illumina adapter overhang nucleotide  
310 sequences. All PCR products were validated through an agarose gel and purified with  
311 magnetic beads. Index PCR was then performed to create the final library which was  
312 also validated through an agarose gel. All samples were pooled together at equimolar  
313 proportions and the final pool was qPCR quantified prior to the MiSeq loading. Raw  
314 Illumina pair-end sequence data were demultiplexed, quality filtered and denoised with

315 QIIME 2 2019.1<sup>42</sup> and DADA2<sup>43</sup>. DADA2 generates single nucleotide exact amplicon  
316 sequence variants (ASVs). ASV are biological meaningful entities as they identify a  
317 specific DNA sequence and allow for higher resolution than using operational  
318 taxonomic units (OTUs)<sup>11</sup>. Taxonomic information was assigned to ASVs using a naïve  
319 Bayes taxonomy classifier against SILVA database release 132 with a 99% identity  
320 sequence<sup>44</sup>. ASVs that did not belong to the kingdom Bacteria, or that were classified as  
321 mitochondrial or chloroplast sequences and samples with an extremely low number of  
322 sequences (8000) were excluded from further analyses. ASVs were aligned with  
323 MAFFT<sup>45</sup> and a rooted phylogenetic tree was constructed with FastTree2<sup>46</sup> using default  
324 settings via QIIME 2. This resulted in a total of 5430 ASVs and 138 Agta (67 women  
325 and 71 men). We generated a rarefaction curve with R package vegan (version 2.5-7)<sup>47</sup>  
326 to determine that the richness of the samples had been fully observed (Supplementary  
327 Figure 8). The number of observed ASVs and Shannon Diversity index were calculated  
328 with R package Phyloseq (version 1.30.0)<sup>48</sup>. Faith's Phylogenetic Diversity index<sup>49</sup> was  
329 calculated with R package picante (version 1.8.2)<sup>50</sup> using the rooted phylogenetic tree  
330 generated in R<sup>51</sup>. To determine the set of microbial traits to be included in the analyses,  
331 we selected ASVs with at least 10 reads in at least 2 individuals (n = 1980), then we  
332 aggregated those with a taxonomic assignment at a genus level, resulting in 110 genera.  
333 At the ASV level we also defined a Core Measurable Microbiota (CMM), consisting of  
334 ASVs that appear in at least 10% of the Agta individuals (14 or more) resulting in 575  
335 ASVs (out of 1980) that represent 90% of the composition of the Agta microbiome.

336

### 337 **Genotype data**

338 A total of 190 saliva samples were genotyped with the Affymetrix Axiom Genome-  
339 Wide Human Origins 1 array. DNA extraction was carried out following the protocol



340 for manual purification of DNA for Oragene-DNA/saliva samples in the same  
341 laboratory that sequenced the 16S rRNA data. Samples were analyzed with Axiom  
342 Analysis Suite v4.0 following the Axiom genotyping best-practices workflow for saliva  
343 samples. 618810 markers and 177 samples passed initial quality control. Single  
344 nucleotide polymorphisms (SNPs) with less than 95% genotyping rate and samples  
345 where the estimated gender from the genotypes did not match the recorded gender were  
346 excluded from the analysis. Duplicated samples were identified with KING<sup>52</sup> and  
347 removed. This resulted in a total of 617063 markers and 174 samples: 141 Agtas, 19  
348 Bayaka and 14 Palanan farmers.

349

### 350 **Ethnographic data collection**

351 Ethnographic data collection occurred over two field seasons from April-June 2013 and  
352 February-October 2014. In the first season we censused 915 Agta individuals (54.7%  
353 which were male) across 20 camps, collecting basic information on household  
354 composition, sex, and estimated ages. Following relative aging protocols<sup>53</sup>, accurate  
355 ages were established for all individuals post data collection.

356

### 357 **Diet data collection**

358 Dietary recall data was collected at the household level over a period of 10 days. We  
359 asked the mother and the father at the end of the day (between 17:00 – 18:00) what  
360 foods they had eaten that day, including agricultural produces from trade with nearby  
361 farmers. We counted the total amount of meals we had recorded for a household and  
362 established what proportion of these consisted of meat, vegetables, fruits, honey, and  
363 rice. Therefore, this is only a rough guide to dietary composition and does not take  
364 calorific intake or absolute weighs of the different food types into account. Dietary data

365 for 80 individuals (37 males and 43 females) was annotated based on the proportion of  
366 meals that consisted of only rice, and the proportion of meals that included meat  
367 (primarily fish and other marine resources and game).

368

### 369 **Classification of oral bacteria as pathogens**

370 Bacteria were classified as potential oral pathogens if they have been reported as  
371 etiological agents of periodontitis or dental caries. Assignment as periodontal pathogen  
372 was performed according to the systematic review of Perez-Chaparro *et al.*<sup>54</sup> and  
373 Socransky *et al.*<sup>55</sup>, or if they have been previously associated with this gum disease<sup>56,57</sup>.  
374 Bacteria were classified as caries pathogens if they were described in transcriptomic  
375 studies of human cavities, according to Simon-Soro *et al.*<sup>58</sup> and Simon-Soro and Mira<sup>59</sup>,  
376 previously associated with caries<sup>60,61</sup>, with cavities<sup>62</sup> or with dental plaque and dental  
377 calculus formation<sup>63,64</sup>. Bacteria reported as etiological agents of respiratory infections  
378 and biofilm-mediated infections were also considered pathogens, including organisms  
379 that can be present in healthy carriers. These included species described in Leung *et*  
380 *al.*<sup>65</sup>, Bellussi *et al.*<sup>66</sup>, and Natsis and Cohen<sup>67</sup>. Bacteria causing urinary tract infection  
381 or sexually transmitted diseases which can transiently be found in the oral cavity were  
382 also considered as potential pathogens and included microorganisms described in Lanao  
383 *et al.*<sup>68</sup> and Jung *et al.*<sup>69</sup>. Common oral commensals potentially causing endocarditis or  
384 systemic infections in immunocompromised patients were not considered pathogens. If  
385 a bacterium was isolated from the oral cavity of an animal, it was considered an oral  
386 inhabitant for the sake of our classification. If taxonomic classification in our dataset  
387 could be assigned at the genus level only, it was considered a pathogen if: i) > 90 of  
388 species within the genus were pathogenic, or ii) it included a major pathogenic species  
389 but the rest of species within the genus were not oral inhabitants, according to the

390 Human Oral Microbiome Database (<http://www.ehond.org/>)<sup>70</sup>. Bacteria with taxonomic  
391 assignments at higher levels than genus (family, order, class) were excluded from this  
392 analysis.

393 For assignment of bacteria to pathogenic or non-pathogenic, we used species-  
394 level ASVs, given that there are multiple cases where different species from the same  
395 genus had a different assignment. If taxonomic classification of the ASV was only  
396 possible at the genus level, it was considered a pathogen if: i) >90% of named species  
397 within the genus were pathogenic, or ii) the genus included a major pathogenic species  
398 but the remaining species within the genus were not classified as oral by the Human  
399 Oral Microbiome Database<sup>70</sup>. ASV with a top hit to a sequence classified as “Oral taxa”  
400 in databases but without a species assignment were not considered named species and  
401 were discarded from the analysis. Cases where taxonomic classification of the ASV was  
402 only possible at the family level or higher were also discarded.

403

#### 404 **Multivariate compositional data analysis on microbial composition**

405 We performed a constrained logratio analysis (LRA) using the package easyCODA<sup>12</sup> in  
406 R<sup>51</sup> on the Agta oral microbiome at the genus level using as constraining covariates age  
407 (as continuous variable), sex (male and female), and diet (both proportion of meals with  
408 meat and proportion of meals with only rice). The microbiome abundance counts of  
409 each Agta individual were treated as compositional data<sup>71</sup> and transformed to logarithms  
410 of ratios (logratios). Constrained LRA is a special case of redundancy analysis<sup>12</sup> where  
411 the total logratio variance is decomposed into parts explained by the covariates (the  
412 "constrained variance") and a residual part (the "unconstrained variance", unrelated to  
413 the covariates). Then, the ordination resulting from the LRA explains a maximum of the  
414 constrained variance in a reduced two-dimensional solution. The statistical significance

415 of the three covariates was assessed using a multivariate permutation test (999  
416 permutations) in the R package `vegan`<sup>47</sup>. There is no correlation between these three  
417 covariates, except within the diet covariate, where the two variables are negatively  
418 correlated (Spearman's  $\rho = -0.54$ ,  $P < 0.0001$ ) (Supplementary Figure 1). To focus on  
419 the genera affected only by internal factors (age and gender), we performed a  
420 constrained LRA on the microbial composition after partialing out the effects of diet.  
421 Similarly, to identify genera affected exclusively by the diet, we performed a  
422 constrained LRA after partialing out the effects of age and gender. Taxon-covariate  
423 association was ranked by counting the number of significant logratios for each of the  
424 taxa, with p-value  $< 0.05$  controlling for the false discovery rate (FDR) at level  $\alpha =$   
425  $0.05$ <sup>72,73</sup>.

426

### 427 **Community detection**

428 To model the relationship between the Agta and the CMM, we used a stochastic block  
429 model (SBM) approach specifically suited for bipartite networks<sup>13</sup>. SBM infers the  
430 community structure<sup>74</sup> that better fits the existing graph, by building a prior distribution  
431 for edges that holds no information on real data and using it in the framework of  
432 Bayesian inference (biSBM) to find a partition of the two types of nodes whose  
433 associated entropy is maximal. In this framework, the absence of links between nodes of  
434 the same type or set is not considered informative for the model, as it is expected given  
435 the bipartite nature of the graph, different from the general version of SBM. We selected  
436 the number of clusters in the two sets that minimize the description length<sup>75</sup>. Robustness  
437 of the clustering was assessed by calculating the average Adjusted Rand Index (ARI)  
438 between iterations ( $n = 100$ ), finding a mean ARI on Agta = 0.90 and a mean ARI on  
439 ASV = 0.70. ARI measures the similarity of two partitions against a null hypothesis of

440 random assignment maintaining the size of the different clusters; the closer to 1 the  
441 more robust is the classification<sup>76</sup>. The resulting clusters were plotted with graph-tool<sup>77</sup>.

442

#### 443 **Ranking of bacteria associated with diet**

444 ASVs present in the Agta were ranked from -1 to 1 based on whether that ASV is more  
445 present than expected in individuals from a given category: low proportion versus high  
446 proportion of meals with only rice, and low proportion versus high proportion of meals  
447 with meat, based on the median value of the population for each variable. Thus, a meat  
448 associated score towards 1 indicates that an ASV is present more than expected in  
449 individuals with high proportion of meals with meat (above the median of the  
450 population), and a score towards -1 indicates that is present more in individuals with  
451 low proportion of meals with meat (below the median of the population). A rice  
452 associated score towards 1 indicates that an ASV is present more than expected in  
453 individuals with high proportion of meals that consist of only rice, and a score towards -  
454 1 indicates that is present more in individuals with low proportion of meals with only  
455 rice.

456

#### 457 **Microbiome genome-wide association studies**

458 To study the relationship between host genetics and the microbiome in the Agta, we  
459 used a genome-wide association study (GWAS) approach to identify specific SNPs  
460 associated with microbial abundance using GEMMA (version 0.94)<sup>78</sup>. GWAS were  
461 performed using the relative abundance of a given taxon in the Agta as a phenotype  
462 trait, adding as covariates age, sex, and household (as a proxy for diet and shared  
463 environment, as members of the same household share a hearth and their food on daily  
464 bases). A kinship matrix calculated by KING using identical by descent segment

465 inference<sup>52</sup> was included as random effects. For the GWAS analyses, we applied the  
466 following quality control steps to the Agta genotypes. First, to detect ancestry outliers in  
467 the dataset, we filtered the samples to keep only bi-allelic autosomal SNPs with Minor  
468 Allele Frequency (MAF) > 5% and without missing data with PLINK 1.9<sup>79</sup>. This dataset  
469 was pruned for linkage disequilibrium (LD) using --indep-pairwise 50 5 0.2, and we  
470 performed a principal component analysis (PCA) with EIGENSOFT (version 7.2.1)<sup>80</sup> to  
471 identify ancestry outliers and exclude them from the analysis (Supplementary Figure 9).  
472 Second, per sample heterozygosity was calculated with PLINK and samples with  
473 overall increased/decreased heterozygosity rates ( $\pm 3$  s.d. from the mean of the  
474 population) were removed. A total of 129 Agta samples passed microbiome and  
475 genotype data quality controls and were included in the microbiome GWAS analyses.  
476 The analyses were done at the genus taxonomic level and on the CMM to study the  
477 effect of host genetics at different taxonomic levels. Depending on the taxon analyzed,  
478 as we included only samples with non-zero abundance, and SNPs with MAF < 10% and  
479 with more than 5% missing data were excluded, the number of individuals tested ranged  
480 from 10 to 129 and the number of SNPs tested ranged from 270569 to 313198 markers.  
481 When we performed the GWAS at the genus level, we only included in the analysis 92  
482 genera that are present in at least 10 Agta individuals to exclude low prevalent genera.  
483 P-values were adjusted for multiple testing by FDR, and SNP-taxa associations were  
484 considered significant at q-value < 0.1 on the cases where the proportion of variance in  
485 the bacterial abundance explained by the genotypes (PVE or “chip heritability”) was  
486 non-zero. The proportion of variance in the phenotype (bacterial abundance) explained  
487 by the genotypes tested (PVE or “chip heritability”) was estimated for each taxon and  
488 was considered non-zero if the standard error measurements did not intersect zero. We  
489 applied genomic control to correct for cryptic relatedness and population stratification

490 and minimize false positives induced by inflated association test statistics<sup>81</sup>. To do so,  
491 we estimated the genomic inflation factor as the median value of the likelihood ratio test  
492 (LRT) values divided by 0.456 (median of a  $\chi^2(1)$  distribution) and recalculated the p-  
493 values after dividing the LRT values by the genomic inflation factor<sup>82</sup>. Threshold of  
494 significance was set at FDR 10%, and only genomic positions having at least three  
495 samples for the major homozygous genotype and for the heterozygous genotype were  
496 considered. SNPs were annotated with ANNOVAR<sup>83</sup> in GRCh37 (hg19) using  
497 RefSeqGene and dbSNP 147. For the enrichment analyses, we extracted the genes  
498 associated to all non-intergenic SNPs and classified the genes in the background set,  
499 that consisted in all genes present in the Axiom Human origin array; and the set to test,  
500 that consisted of all genes that had a non-intergenic SNP significantly associated with  
501 an ASV or a genus. We performed a gene ontology enrichment analysis with  
502 ViSEAGO<sup>84</sup> and TopGo<sup>85</sup> R packages (Fisher exact test) and FUMA  
503 GENE2FUNCTION module (Functional Mapping and Annotation of Genome-Wide  
504 Association Studies)<sup>86</sup> to perform pathway enrichment analysis (hypergeometric test)  
505 with FDR 5%.

506

### 507 **Selection analyses**

508 To test whether the GWAS SNPs showed any signal of recent positive selection we  
509 performed a genome-wide scan of selection. We phased the Agta and Palanan farmer  
510 populations independently. For each population, samples that were identified as  
511 ancestry outliers by a PCA or with overall increased/decreased heterozygosity rates ( $\pm 3$   
512 s.d. from the mean of the population) were excluded from phasing. A total of 138 Agta  
513 samples were phased using SHAPEIT2 version v2 (r900)<sup>87</sup> with the duoHMM method  
514 to improve the phasing by integrating the known pedigree information. SNPs with



515 missing data were removed and window size was set to 5Mb for phasing. Due to the  
516 small sample size, to phase the 14 unrelated Palanan farmers we used SHAPEIT2 with  
517 default parameters and the 1,000 Genomes Phase 3 panel of haplotypes<sup>88</sup> as a reference  
518 dataset. SNPs with missing data were removed. For the selection analyses, we excluded  
519 one of each pair of related individuals by removing the sample in the pair with the  
520 lowest call rate in the Agta phased dataset. This resulted in 38 unrelated Agta  
521 individuals and 14 unrelated Palanan farmers. We ran the Integrated Haplotype Score  
522 (iHS)<sup>89</sup> in the Agta phased dataset and the Cross-population Extended Haplotype  
523 Homozygosity (XP-EHH) test<sup>90</sup> comparing the Agta against Palanan farmers as  
524 implemented in selscan version v1.3.0<sup>91</sup> to identify signals of positive selection in  
525 GWAS SNPs. Both tests were run with default parameters and with the genetic map  
526 provided by the 1,000 Genomes Phase 3<sup>88</sup>. To identify regions under selection, for each  
527 test we selected markers with scores in the 95th percentile that had at least 3 markers in  
528 the 99th percentile in the surrounding area ( $\pm 10$  Kb). For iHS we used absolute values,  
529 while only positive scores were analyzed for XP-EHH.

530

### 531 **Acknowledgements**

532 A.B.M was funded by Leverhulme Trust Grant RP2011-R 045 and PLP-2017-323. J.B.  
533 received grant PID2019-110933GB-I00/AEI/10.13039/501100011033 from the  
534 Agencia Estatal Investigación (AEI), Spain, grant GRC 2017 SGR 702 from Secretaria  
535 d'Universitats i Recerca del Departament d'Economia i Coneixement de la Generalitat  
536 de Catalunya, as well as grant CEX2018-000792-M, part of the “Unidad de Excelencia  
537 María de Maeztu” funded by the AEI, which granted the microbiome analysis by the  
538 Servei de Genòmica at Universitat Pompeu Fabra. A.M. is funded by grant RTI2018-

539 102032-B-100 from AEI (Spain). A.E.P. is funded by grant MR/P014216/1 from the  
540 Medical Research Council.

541

#### 542 **Data availability**

543 16S amplicon data (EGAS00001005317) are deposited at the European Genome-  
544 phenome Archive (EGA), which is hosted at the EBI and the CRG. Genome data  
545 generated in this study has been deposited at EGA under accession number  
546 EGAS00001005315. Data at the individual level on age, household composition and  
547 diet that support the findings of this study are available on request from the  
548 corresponding authors (JB and ABM). The individual data are not publicly available  
549 due to them containing information that could compromise research participant privacy.

550

#### 551 **Code availability**

552 Source code and data for visualization are available at

553 <https://doi.org/10.5281/zenodo.6342212>

554

555

#### 556 **References**

- 557 1. Cornejo Ulloa, P., van der Veen, M. H. & Krom, B. P. Review: modulation of the  
558 oral microbiome by the host to promote ecological balance. *Odontology* **107**,  
559 437–448 (2019).
- 560 2. Weyrich, L. S. The evolutionary history of the human oral microbiota and its  
561 implications for modern health. *Periodontol. 2000* **85**, 90–100 (2021).
- 562 3. Gomez, A. *et al.* Host Genetic Control of the Oral Microbiome in Health and  
563 Disease. *Cell Host Microbe* **22**, 269-278.e3 (2017).
- 564 4. Willis, J. R. *et al.* Citizen science charts two major “stomatotypes” in the oral  
565 microbiome of adolescents and reveals links with habits and drinking water  
566 composition. *Microbiome* **6**, 218 (2018).

- 567 5. Costello, E. K. *et al.* Bacterial Community Variation in Human Body Habitats  
568 Across Space and Time. *Science (80-. )*. **326**, 1694–1697 (2009).
- 569 6. Velsko, I. M. *et al.* Microbial differences between dental plaque and historic  
570 dental calculus are related to oral biofilm maturation stage. *Microbiome* **7**, 102  
571 (2019).
- 572 7. Page, A. E., Minter, T., Viguier, S. & Migliano, A. B. Hunter-gatherer health and  
573 development policy: How the promotion of sedentism worsens the Agta’s health  
574 outcomes. *Soc. Sci. Med.* **197**, 39–48 (2018).
- 575 8. Minter, T. The Agta of the Northern Sierra Madre: Livelihood Strategies and  
576 Resilience Among Philippine Hunter-gatherers. (Faculty of Social Sciences,  
577 Leiden University, 2010).
- 578 9. Page, A. E. *et al.* Reproductive trade-offs in extant hunter-gatherers suggest  
579 adaptive mechanism for the Neolithic expansion. *Proc. Natl. Acad. Sci.* **113**,  
580 4694–4699 (2016).
- 581 10. Dyble, M., Thorley, J., Page, A. E., Smith, D. & Migliano, A. B. Engagement in  
582 agricultural work is associated with reduced leisure time among Agta hunter-  
583 gatherers. *Nat. Hum. Behav.* **3**, 792–796 (2019).
- 584 11. Callahan, B. J., McMurdie, P. J. & Holmes, S. P. Exact sequence variants should  
585 replace operational taxonomic units in marker-gene data analysis. *ISME J.* **11**,  
586 2639–2643 (2017).
- 587 12. Greenacre, M. *Compositional data analysis in practice*. (Chapman and  
588 Hall/CRC, 2018).
- 589 13. Larremore, D. B., Clauset, A. & Jacobs, A. Z. Efficiently inferring community  
590 structure in bipartite networks. *Phys. Rev. E* **90**, 012805 (2014).
- 591 14. Rosier, B. T., Moya-Gonzalez, E. M., Corell-Escuin, P. & Mira, A. Isolation  
592 and Characterization of Nitrate-Reducing Bacteria as Potential Probiotics for  
593 Oral and Systemic Health. *Front. Microbiol.* **11**, 2261 (2020).
- 594 15. Kassebaum, N. J. *et al.* Global Burden of Severe Periodontitis in 1990-2010. *J.*  
595 *Dent. Res.* **93**, 1045–1053 (2014).
- 596 16. De Maeyer, R. P. H. & Chambers, E. S. The impact of ageing on monocytes and  
597 macrophages. *Immunol. Lett.* **230**, 1–10 (2021).
- 598 17. Dyble, M. *et al.* Networks of Food Sharing Reveal the Functional Significance of  
599 Multilevel Sociality in Two Hunter-Gatherer Groups. *Curr. Biol.* **26**, 2017–2021  
600 (2016).
- 601 18. Migliano, A. B. *et al.* Characterization of hunter-gatherer networks and  
602 implications for cumulative culture. *Nat. Hum. Behav.* **1**, 0043 (2017).
- 603 19. Duan, X. *et al.* Smoking May Lead to Marginal Bone Loss Around Non-  
604 Submerged Implants During Bone Healing by Altering Salivary Microbiome: A  
605 Prospective Study. *J. Periodontol.* **88**, 1297–1308 (2017).
- 606 20. Eisenhofer, R. *et al.* Contamination in Low Microbial Biomass Microbiome  
607 Studies: Issues and Recommendations. *Trends Microbiol.* **27**, 105–117 (2019).
- 608 21. Liu, S., Ying, G.-G., Liu, Y.-S., Peng, F.-Q. & He, L.-Y. Degradation of  
609 Norgestrel by Bacteria from Activated Sludge: Comparison to Progesterone.

- 610 *Environ. Sci. Technol.* **47**, 130829113920003 (2013).
- 611 22. Shiau, H. J. & Reynolds, M. A. Sex Differences in Destructive Periodontal  
612 Disease: A Systematic Review. *J. Periodontol.* **81**, 1379–1389 (2010).
- 613 23. Eke, P. I. *et al.* Update on Prevalence of Periodontitis in Adults in the United  
614 States: NHANES 2009 to 2012. *J. Periodontol.* **86**, 611–622 (2015).
- 615 24. Ferraro, M. & Vieira, A. R. Explaining Gender Differences in Caries: A  
616 Multifactorial Approach to a Multifactorial Disease. *Int. J. Dent.* **2010**, 1–5  
617 (2010).
- 618 25. Zaura, E. *et al.* On the ecosystemic network of saliva in healthy young adults.  
619 *ISME J.* **11**, 1218–1231 (2017).
- 620 26. Fernández, L., Pannaraj, P. S., Rautava, S. & Rodríguez, J. M. The Microbiota of  
621 the Human Mammary Ecosystem. *Front. Cell. Infect. Microbiol.* **10**, 689 (2020).
- 622 27. David, L. A. *et al.* Diet rapidly and reproducibly alters the human gut  
623 microbiome. *Nature* **505**, 559–563 (2014).
- 624 28. Turnbaugh, P. J. *et al.* The Effect of Diet on the Human Gut Microbiome: A  
625 Metagenomic Analysis in Humanized Gnotobiotic Mice. *Sci. Transl. Med.* **1**,  
626 6ra14–6ra14 (2009).
- 627 29. Schnorr, S. L. *et al.* Gut microbiome of the Hadza hunter-gatherers. *Nat.*  
628 *Commun.* **5**, 3654 (2014).
- 629 30. Smits, S. A. *et al.* Seasonal cycling in the gut microbiome of the Hadza hunter-  
630 gatherers of Tanzania. *Science (80-. ).* **357**, 802–806 (2017).
- 631 31. Belstrøm, D. *et al.* Bacterial profiles of saliva in relation to diet, lifestyle factors,  
632 and socioeconomic status. *J. Oral Microbiol.* **6**, 23609 (2014).
- 633 32. De Filippis, F. *et al.* The Same Microbiota and a Potentially Discriminant  
634 Metabolome in the Saliva of Omnivore, Ovo-Lacto-Vegetarian and Vegan  
635 Individuals. *PLoS One* **9**, e112373 (2014).
- 636 33. Fives-Taylor, P. M., Meyer, D. H., Mintz, K. P. & Brissette, C. Virulence factors  
637 of *Actinobacillus actinomycetemcomitans*. *Periodontol. 2000* **20**, 136–67 (1999).
- 638 34. Adler, C. J. *et al.* Sequencing ancient calcified dental plaque shows changes in  
639 oral microbiota with dietary shifts of the Neolithic and Industrial revolutions.  
640 *Nat. Genet.* **45**, 450–455 (2013).
- 641 35. Sabbatani, S. & Fiorino, S. Dental worm disease. *Le Infez. Med.* **24**, 349–358  
642 (2016).
- 643 36. Kolde, R. *et al.* Host genetic variation and its microbiome interactions within the  
644 Human Microbiome Project. *Genome Med.* **10**, 6 (2018).
- 645 37. Blekhman, R. *et al.* Host genetic variation impacts microbiome composition  
646 across human body sites. *Genome Biol.* **16**, 191 (2015).
- 647 38. Shaw, L. *et al.* The Human Salivary Microbiome Is Shaped by Shared  
648 Environment Rather than Genetics: Evidence from a Large Family of Closely  
649 Related Individuals. *MBio* **8**, e01237-17 (2017).
- 650 39. Mira, A., Artacho, A., Camelo-Castillo, A., Garcia-Esteban, S. & Simon-Soro, A.  
651 Salivary Immune and Metabolic Marker Analysis (SIMMA): A Diagnostic Test

- 652 to Predict Caries Risk. *Diagnostics* **7**, 38 (2017).
- 653 40. Preshaw, P. M., Henne, K., Taylor, J. J., Valentine, R. A. & Conrads, G. Age-  
654 related changes in immune function (immune senescence) in caries and  
655 periodontal diseases: a systematic review. *J. Clin. Periodontol.* **44**, S153–S177  
656 (2017).
- 657 41. Mukherjee, C. *et al.* Acquisition of oral microbiota is driven by environment, not  
658 host genetics. *Microbiome* **9**, 54 (2021).
- 659 42. Bolyen, E. *et al.* Reproducible, interactive, scalable and extensible microbiome  
660 data science using QIIME 2. *Nat. Biotechnol.* **37**, 852–857 (2019).
- 661 43. Callahan, B. J. *et al.* DADA2: High-resolution sample inference from Illumina  
662 amplicon data. *Nat. Methods* **13**, 581–583 (2016).
- 663 44. Quast, C. *et al.* The SILVA ribosomal RNA gene database project: improved data  
664 processing and web-based tools. *Nucleic Acids Res.* **41**, D590–D596 (2012).
- 665 45. Katoh, K. MAFFT: a novel method for rapid multiple sequence alignment based  
666 on fast Fourier transform. *Nucleic Acids Res.* **30**, 3059–3066 (2002).
- 667 46. Price, M. N., Dehal, P. S. & Arkin, A. P. FastTree 2 – Approximately Maximum-  
668 Likelihood Trees for Large Alignments. *PLoS One* **5**, e9490 (2010).
- 669 47. Oksanen, J. *et al.* Vegan: community ecology package. Ordination methods,  
670 diversity analysis and other functions for community and vegetation ecologists. *R*  
671 *Packag. version 2.5-7* (2020).
- 672 48. McMurdie, P. J. & Holmes, S. phyloseq: An R Package for Reproducible  
673 Interactive Analysis and Graphics of Microbiome Census Data. *PLoS One* **8**,  
674 e61217 (2013).
- 675 49. Faith, D. P. Conservation evaluation and phylogenetic diversity. *Biol. Conserv.*  
676 **61**, 1–10 (1992).
- 677 50. Kembel, S. W. *et al.* Picante: R tools for integrating phylogenies and ecology.  
678 *Bioinformatics* **26**, 1463–1464 (2010).
- 679 51. R Core Team. R: A language and environment for statistical computing. (2020).
- 680 52. Manichaikul, A. *et al.* Robust relationship inference in genome-wide association  
681 studies. *Bioinformatics* **26**, 2867–2873 (2010).
- 682 53. Diekmann, Y. *et al.* Accurate age estimation in small-scale societies. *Proc. Natl.*  
683 *Acad. Sci.* **114**, 8205–8210 (2017).
- 684 54. Pérez-Chaparro, P. J. *et al.* Newly Identified Pathogens Associated with  
685 Periodontitis. *J. Dent. Res.* **93**, 846–858 (2014).
- 686 55. Socransky, S. S., Haffajee, A. D., Cugini, M. A., Smith, C. & Kent, R. L.  
687 Microbial complexes in subgingival plaque. *J. Clin. Periodontol.* **25**, 134–144  
688 (1998).
- 689 56. Camelo-Castillo, A. *et al.* Relationship between periodontitis-associated  
690 subgingival microbiota and clinical inflammation by 16S pyrosequencing. *J.*  
691 *Clin. Periodontol.* **42**, 1074–1082 (2015).
- 692 57. Khemwong, T. *et al.* Fretibacterium sp. human oral taxon 360 is a novel  
693 biomarker for periodontitis screening in the Japanese population. *PLoS One* **14**,

- 694 e0218266 (2019).
- 695 58. Simón-Soro, A., Guillen-Navarro, M. & Mira, A. Metatranscriptomics reveals  
696 overall active bacterial composition in caries lesions. *J. Oral Microbiol.* **6**, 25443  
697 (2014).
- 698 59. Simón-Soro, A. & Mira, A. Solving the etiology of dental caries. *Trends*  
699 *Microbiol.* **23**, 76–82 (2015).
- 700 60. Tanner, A. C. R. Anaerobic culture to detect periodontal and caries pathogens. *J.*  
701 *Oral Biosci.* **57**, 18–26 (2015).
- 702 61. Kressirer, C. A. *et al.* *Scardovia wiggsiae* and its potential role as a caries  
703 pathogen. *J. Oral Biosci.* **59**, 135–141 (2017).
- 704 62. Wolff, D. *et al.* Amplicon-based microbiome study highlights the loss of  
705 diversity and the establishment of a set of species in patients with dentin caries.  
706 *PLoS One* **14**, e0219714 (2019).
- 707 63. Mark Welch, J. L., Rossetti, B. J., Rieken, C. W., Dewhirst, F. E. & Borisy, G. G.  
708 Biogeography of a human oral microbiome at the micron scale. *Proc. Natl. Acad.*  
709 *Sci.* **113**, E791–E800 (2016).
- 710 64. Ferrer, M. D. & Mira, A. Oral Biofilm Architecture at the Microbial Scale.  
711 *Trends Microbiol.* **24**, 246–248 (2016).
- 712 65. Leung, A. K. C., Wong, A. H. C. & Hon, K. L. Community-Acquired Pneumonia  
713 in Children. *Recent Pat. Inflamm. Allergy Drug Discov.* **12**, 136–144 (2018).
- 714 66. Bellussi, L. M. *et al.* An overview on upper respiratory tract infections and  
715 bacteriotherapy as innovative therapeutic strategy. *Eur. Rev. Med. Pharmacol.*  
716 *Sci.* **23**, 27–38 (2019).
- 717 67. Natsis, N. E. & Cohen, P. R. Coagulase-Negative Staphylococcus Skin and Soft  
718 Tissue Infections. *Am. J. Clin. Dermatol.* **19**, 671–677 (2018).
- 719 68. Lanao, A. E. & Pearson-Shaver, A. L. Mycoplasma infections. *StatPearls*  
720 *[Internet]* (2020).
- 721 69. Jung, H.-S., Ehlers, M. M., Lombaard, H., Redelinguys, M. J. & Kock, M. M.  
722 Etiology of bacterial vaginosis and polymicrobial biofilm formation. *Crit. Rev.*  
723 *Microbiol.* **43**, 651–667 (2017).
- 724 70. Escapa, I. F. *et al.* New Insights into Human Nostril Microbiome from the  
725 Expanded Human Oral Microbiome Database (eHOMD): a Resource for the  
726 Microbiome of the Human Aerodigestive Tract. *mSystems* **3**, e00187-18 (2018).
- 727 71. Gloor, G. B., Macklaim, J. M., Pawlowsky-Glahn, V. & Egozcue, J. J.  
728 Microbiome Datasets Are Compositional: And This Is Not Optional. *Front.*  
729 *Microbiol.* **8**, 2224 (2017).
- 730 72. Benjamini, Y. & Hochberg, Y. Controlling the false discovery rate: a practical  
731 and powerful approach to multiple testing. *J. R. Stat. Soc. Ser. B* **57**, 289–  
732 300 (1995).
- 733 73. Storey, J. D. A direct approach to false discovery rates. *J. R. Stat. Soc. Ser. B*  
734 *(Statistical Methodol.* **64**, 479–498 (2002).
- 735 74. Fortunato, S. Community detection in graphs. *Phys. Rep.* **486**, 75–174 (2010).



- 736 75. Peixoto, T. P. Nonparametric Bayesian inference of the microcanonical stochastic  
737 block model. *Phys. Rev. E* **95**, 012317 (2017).
- 738 76. Hubert, L. & Arabie, P. Comparing partitions. *J. Classif.* **2**, 193–218 (1985).
- 739 77. Tiago, P. P. The graph-tool python library. *figshare* (2014).  
740 doi:10.6084/m9.figshare.1164194
- 741 78. Zhou, X. & Stephens, M. Genome-wide efficient mixed-model analysis for  
742 association studies. *Nat. Genet.* **44**, 821–824 (2012).
- 743 79. Chang, C. C. *et al.* Second-generation PLINK: rising to the challenge of larger  
744 and richer datasets. *Gigascience* **4**, 7 (2015).
- 745 80. Patterson, N., Price, A. L. & Reich, D. Population Structure and Eigenanalysis.  
746 *PLoS Genet.* **2**, e190 (2006).
- 747 81. Devlin, B. & Roeder, K. Genomic Control for Association Studies. *Biometrics*  
748 **55**, 997–1004 (1999).
- 749 82. Bacanu, S.-A., Devlin, B. & Roeder, K. The Power of Genomic Control. *Am. J.*  
750 *Hum. Genet.* **66**, 1933–1944 (2000).
- 751 83. Wang, K., Li, M. & Hakonarson, H. ANNOVAR: functional annotation of  
752 genetic variants from high-throughput sequencing data. *Nucleic Acids Res.* **38**,  
753 e164–e164 (2010).
- 754 84. Brionne, A., Juanchich, A. & Hennequet-Antier, C. ViSEAGO: a Bioconductor  
755 package for clustering biological functions using Gene Ontology and semantic  
756 similarity. *BioData Min.* **12**, 16 (2019).
- 757 85. Alexa, A. & Rahnenfuhrer, J. topGO: Enrichment Analysis for Gene Ontology.  
758 (2019).
- 759 86. Watanabe, K., Taskesen, E., van Bochoven, A. & Posthuma, D. Functional  
760 mapping and annotation of genetic associations with FUMA. *Nat. Commun.* **8**,  
761 1826 (2017).
- 762 87. O’Connell, J. *et al.* A General Approach for Haplotype Phasing across the Full  
763 Spectrum of Relatedness. *PLoS Genet.* **10**, e1004234 (2014).
- 764 88. Auton, A. *et al.* A global reference for human genetic variation. *Nature* **526**, 68–  
765 74 (2015).
- 766 89. Voight, B. F., Kudaravalli, S., Wen, X. & Pritchard, J. K. A Map of Recent  
767 Positive Selection in the Human Genome. *PLoS Biol.* **4**, e72 (2006).
- 768 90. Sabeti, P. C. *et al.* Genome-wide detection and characterization of positive  
769 selection in human populations. *Nature* **449**, 913–918 (2007).
- 770 91. Szpiech, Z. A. & Hernandez, R. D. selscan: An Efficient Multithreaded Program  
771 to Perform EHH-Based Scans for Positive Selection. *Mol. Biol. Evol.* **31**, 2824–  
772 2827 (2014).  
773
